# Supplementary material for: A cellular lipidomic study on the Aβ-induced neurotoxicity and neuroprotective effects of EGCG by using UPLC/MS-based glycerolipids profiling and multivariate analysis
Source: Royal Society of Chemistry journal article supplement (doi:10.1039/c2mb25126d), 2012-10-03

## Supporting Information

**Table S1 List of major GLs identified in PC 12 cell line based on accurate MS data.**

| No.                   | <i>t</i> R<br>(min) | Selected<br>ion          | Exact<br><i>m/z</i> | Error<br>(ppm) | Formula           | Tentatively assignment<br>of GLs |
|-----------------------|---------------------|--------------------------|---------------------|----------------|-------------------|----------------------------------|
| 1                     | 2.21                | [M+H] <sup>+</sup>       | 496.3430            | 5.4            | C24H50NO7P        | LPC 16:0 or PAF 14:0             |
| <b>2<sup>a</sup></b>  | <b>2.95</b>         | <b>[M+H]<sup>+</sup></b> | <b>524.3735</b>     | <b>3.6</b>     | <b>C26H54NO7P</b> | <b>LPC 18:0 or PAF 16:0</b>      |
| 3                     | 5.44                | [M+H] <sup>+</sup>       | 780.5538            | 0.6            | C44H78NO8P        | PC 36:5                          |
| 4                     | 5.79                | [M+H] <sup>+</sup>       | 730.5393            | 0.8            | C40H76NO8P        | PC 32:2                          |
| 5                     | 5.87                | [M+H] <sup>+</sup>       | 756.5548            | 0.7            | C42H78NO8P        | PC 34:3                          |
| 6                     | 5.98                | [M+H] <sup>+</sup>       | 780.5552            | 1.2            | C44H78NO8P        | PC 36:5                          |
| 7                     | 6.03                | [M+H] <sup>+</sup>       | 806.5736            | 4.5            | C46H80NO8P        | PC 38:6                          |
| 8                     | 6.06                | [M+H] <sup>+</sup>       | 782.5717            | 2.2            | C44H80NO8P        | PC 36:4                          |
| 9                     | 6.08                | [M+H] <sup>+</sup>       | 756.5551            | 1.1            | C42H78NO8P        | PC 34:3                          |
| 10                    | 6.13                | [M+H] <sup>+</sup>       | 782.5725            | 3.2            | C44H80NO8P        | PC 36:4                          |
| 11                    | 6.24                | [M+H] <sup>+</sup>       | 808.5906            | 6.2            | C46H82NO8P        | PC 38:5                          |
| 12                    | 6.58                | [M+H] <sup>+</sup>       | 732.5553            | 1.4            | C40H79NO8P        | PC 32:1                          |
| 13                    | 6.64                | [M+H] <sup>+</sup>       | 782.5697            | 0.4            | C44H80NO8P        | PC 36:4                          |
| 14                    | 6.68                | [M+H] <sup>+</sup>       | 808.5894            | 4.7            | C46H82NO8P        | PC 38:5                          |
| <b>15<sup>a</sup></b> | <b>6.81</b>         | <b>[M+H]<sup>+</sup></b> | <b>758.5706</b>     | <b>0.8</b>     | <b>C42H80NO8P</b> | <b>PC 34:2</b>                   |
| <b>16<sup>a</sup></b> | <b>6.85</b>         | <b>[M+H]<sup>+</sup></b> | <b>784.5880</b>     | <b>3.1</b>     | <b>C44H82NO8P</b> | <b>PC 36:3</b>                   |
| 17                    | 6.93                | [M+H] <sup>+</sup>       | 766.5416            | 3.8            | C43H76NO8P        | PC 35:5                          |
| 18                    | 7.00                | [M+H] <sup>+</sup>       | 810.6063            | 6.2            | C46H84NO8P        | PC 38:4                          |
| 19                    | 7.01                | [M+H] <sup>+</sup>       | 784.5884            | 3.6            | C44H82NO8P        | PC 36:3                          |
| 20                    | 7.01                | [M+H] <sup>+</sup>       | 808.5887            | 3.8            | C46H82NO8P        | PC 38:5                          |
| 21                    | 7.06                | [M+H] <sup>+</sup>       | 720.5536            | 1.0            | C39H78NO8P        | PC 31:0                          |
| 22                    | 7.11                | [M+H] <sup>+</sup>       | 746.5714            | 1.9            | C41H80NO8P        | PC 33:1                          |
| 23                    | 7.11                | [M+H] <sup>+</sup>       | 742.5399            | 1.6            | C41H76NO8P        | PC 33:3                          |
| 24                    | 7.20                | [M+H] <sup>+</sup>       | 792.5957            | 6.3            | C46H82NO7P        | PC P-38:5                        |
| 25                    | 7.28                | [M+H] <sup>+</sup>       | 766.5411            | 3.1            | C43H76NO8P        | PC 35:5                          |

|                       |             |                                   |                 |            |                   |                |
|-----------------------|-------------|-----------------------------------|-----------------|------------|-------------------|----------------|
| 26                    | 7.38        | [M+H] <sup>+</sup>                | 772.5833        | 3.0        | C43H82NO8P        | PC 35:2        |
| 27                    | 7.38        | [M+H] <sup>+</sup>                | 794.6047        | 2.1        | C46H84NO7P        | PC P-38:4      |
| <b>28<sup>a</sup></b> | <b>7.68</b> | <b>[M+H]<sup>+</sup></b>          | <b>734.5703</b> | <b>0.4</b> | <b>C40H80NO8P</b> | <b>PC 32:0</b> |
| <b>29<sup>a</sup></b> | <b>7.73</b> | <b>[M+H]<sup>+</sup></b>          | <b>760.5875</b> | <b>2.5</b> | <b>C42H82NO8P</b> | <b>PC 34:1</b> |
| <b>30<sup>a</sup></b> | <b>7.77</b> | <b>[M+H]<sup>+</sup></b>          | <b>786.6024</b> | <b>1.4</b> | <b>C44H84NO8P</b> | <b>PC 36:2</b> |
| 31                    | 7.78        | [M+H] <sup>+</sup>                | 810.6072        | 7.3        | C46H84NO8P        | PC 38:4        |
| 32                    | 7.95        | [M+H] <sup>+</sup>                | 812.6221        | 6.4        | C46H86NO8P        | PC 38:3        |
| 33                    | 8.00        | [M+H] <sup>+</sup>                | 786.6035        | 2.8        | C44H84NO8P        | PC 36:2        |
| 34                    | 8.08        | [M+H] <sup>+</sup>                | 768.5583        | 5.2        | C43H78NO8P        | PC 35:4        |
| 35                    | 8.30        | [M+H] <sup>+</sup>                | 744.5582        | 5.2        | C41H78NO8P        | PC 33:2        |
| 36                    | 8.38        | [M+H] <sup>+</sup>                | 774.6017        | 0.5        | C43H84NO8P        | PC 35:1        |
| 37                    | 8.52        | [M+H] <sup>+</sup>                | 746.6078        | 1.9        | C42H84NO7P        | PC P-34:0      |
| 38                    | 8.53        | [M+H] <sup>+</sup>                | 720.5913        | 0.8        | C40H82NO7P        | PC O-32:0      |
| 39                    | 9.02        | [M+H] <sup>+</sup>                | 762.6049        | 4.7        | C42H84NO8P        | PC 34:0        |
| 40                    | 9.07        | [M+H] <sup>+</sup>                | 788.6202        | 4.2        | C44H86NO8P        | PC 36:1        |
| 41                    | 9.40        | [M+H] <sup>+</sup>                | 746.5697        | 0.4        | C41H80NO8P        | PC 33:1        |
| 42                    | 16.97       | [M+NH <sub>4</sub> ] <sup>+</sup> | 894.7584        | 3.7        | C57H96O6          | TG 54:7        |
| 43                    | 16.97       | [M+NH <sub>4</sub> ] <sup>+</sup> | 868.7424        | 3.5        | C55H94O6          | TG 52:6        |
| 44                    | 17.27       | [M+NH <sub>4</sub> ] <sup>+</sup> | 894.7611        | 6.7        | C57H96O6          | TG 54:7        |
| 45                    | 17.27       | [M+NH <sub>4</sub> ] <sup>+</sup> | 920.7721        | 1.5        | C59H98O6          | TG 56:8        |
| 46                    | 17.33       | [M+NH <sub>4</sub> ] <sup>+</sup> | 818.7233        | 0.6        | C51H92O6          | TG 48:3        |
| 47                    | 17.33       | [M+NH <sub>4</sub> ] <sup>+</sup> | 844.7440        | 5.4        | C53H94O6          | TG 50:4        |
| 48                    | 17.40       | [M+NH <sub>4</sub> ] <sup>+</sup> | 896.7747        | 4.5        | C57H98O6          | TG 54:6        |
| 49                    | 17.40       | [M+NH <sub>4</sub> ] <sup>+</sup> | 870.7600        | 5.6        | C55H96O6          | TG 52:5        |
| 50                    | 17.60       | [M+NH <sub>4</sub> ] <sup>+</sup> | 922.7906        | 4.6        | C59H100O6         | TG 56:7        |
| 51                    | 17.67       | [M+NH <sub>4</sub> ] <sup>+</sup> | 896.7764        | 6.4        | C57H98O6          | TG 54:6        |
| 52                    | 17.69       | [M+NH <sub>4</sub> ] <sup>+</sup> | 846.7561        | 1.2        | C53H96O6          | TG 50:3        |
| 53                    | 17.69       | [M+NH <sub>4</sub> ] <sup>+</sup> | 820.7408        | 1.7        | C51H94O6          | TG 48:2        |
| 54                    | 17.70       | [M+NH <sub>4</sub> ] <sup>+</sup> | 794.7233        | 0.6        | C49H92O6          | TG 46:1        |

|                       |              |                                       |                 |            |                  |                |
|-----------------------|--------------|---------------------------------------|-----------------|------------|------------------|----------------|
| <b>55<sup>a</sup></b> | <b>17.75</b> | <b>[M+NH<sub>4</sub>]<sup>+</sup></b> | <b>872.7747</b> | <b>4.6</b> | <b>C55H98O6</b>  | <b>TG 52:4</b> |
| 56                    | 17.75        | [M+NH <sub>4</sub> ] <sup>+</sup>     | 898.7882        | 2.0        | C57H100O6        | TG 54:5        |
| 57                    | 17.77        | [M+NH <sub>4</sub> ] <sup>+</sup>     | 846.7589        | 4.5        | C53H96O6         | TG 50:3        |
| 58                    | 17.82        | [M+NH <sub>4</sub> ] <sup>+</sup>     | 782.7253        | 1.9        | C48H92O6         | TG 45:0        |
| 59                    | 17.85        | [M+NH <sub>4</sub> ] <sup>+</sup>     | 860.7710        | 0.3        | C54H98O6         | TG 51:3        |
| 60                    | 17.87        | [M+NH <sub>4</sub> ] <sup>+</sup>     | 834.7567        | 1.9        | C52H96O6         | TG 49:2        |
| 61                    | 17.87        | [M+NH <sub>4</sub> ] <sup>+</sup>     | 808.7419        | 3.1        | C50H94O6         | TG 47:1        |
| 62                    | 17.90        | [M+NH <sub>4</sub> ] <sup>+</sup>     | 924.8068        | 5.2        | C59H102O6        | TG 56:6        |
| 63                    | 17.94        | [M+NH <sub>4</sub> ] <sup>+</sup>     | 860.7703        | 0.5        | C54H98O6         | TG 51:3        |
| 64                    | 18.00        | [M+NH <sub>4</sub> ] <sup>+</sup>     | 796.7396        | 0.3        | C49H94O6         | TG 46:0        |
| 65                    | 18.00        | [M+NH <sub>4</sub> ] <sup>+</sup>     | 822.7567        | 1.9        | C51H96O6         | TG 48:1        |
| 66                    | 18.02        | [M+NH <sub>4</sub> ] <sup>+</sup>     | 848.7753        | 5.4        | C53H98O6         | TG 50:2        |
| <b>67<sup>a</sup></b> | <b>18.02</b> | <b>[M+NH<sub>4</sub>]<sup>+</sup></b> | <b>874.7883</b> | <b>2.2</b> | <b>C55H100O6</b> | <b>TG 52:3</b> |
| 68                    | 18.06        | [M+NH <sub>4</sub> ] <sup>+</sup>     | 900.8081        | 6.8        | C57H102O6        | TG 54:4        |
| 69                    | 18.16        | [M+NH <sub>4</sub> ] <sup>+</sup>     | 862.7902        | 4.4        | C54H100O6        | TG 51:2        |
| 70                    | 18.21        | [M+NH <sub>4</sub> ] <sup>+</sup>     | 926.8167        | 1.1        | C59H104O6        | TG 48:0        |
| <b>71<sup>a</sup></b> | <b>18.26</b> | <b>[M+NH<sub>4</sub>]<sup>+</sup></b> | <b>876.8086</b> | <b>7.5</b> | <b>C55H102O6</b> | <b>TG 52:2</b> |
| <b>72<sup>a</sup></b> | <b>18.27</b> | <b>[M+NH<sub>4</sub>]<sup>+</sup></b> | <b>850.7881</b> | <b>2.0</b> | <b>C53H100O6</b> | <b>TG 50:1</b> |
| 73                    | 18.27        | [M+NH <sub>4</sub> ] <sup>+</sup>     | 902.8186        | 1.0        | C57H104O6        | TG 54:3        |
| 74                    | 18.29        | [M+NH <sub>4</sub> ] <sup>+</sup>     | 824.7712        | 0.6        | C51H98O6         | TG 48:0        |
| 75                    | 18.31        | [M+NH <sub>4</sub> ] <sup>+</sup>     | 928.8331        | 0.2        | C59H106O6        | TG 56:4        |
| 76                    | 18.37        | [M+NH <sub>4</sub> ] <sup>+</sup>     | 864.8032        | 1.4        | C54H102O6        | TG 51:1        |
| 77                    | 18.37        | [M+NH <sub>4</sub> ] <sup>+</sup>     | 890.8174        | 0.3        | C56H104O6        | TG 53:2        |
| 78                    | 18.39        | [M+NH <sub>4</sub> ] <sup>+</sup>     | 834.7596        | 5.4        | C52H96O6         | TG 49:2        |
| 79                    | 18.46        | [M+NH <sub>4</sub> ] <sup>+</sup>     | 930.8464        | 2.8        | C59H108O6        | TG 56:3        |
| 80                    | 18.46        | [M+NH <sub>4</sub> ] <sup>+</sup>     | 904.8333        | 0.2        | C57H106O6        | TG 54:2        |
| 81                    | 18.47        | [M+NH <sub>4</sub> ] <sup>+</sup>     | 878.8177        | 1.7        | C55H104O6        | TG 52:1        |
| 82                    | 18.66        | [M+NH <sub>4</sub> ] <sup>+</sup>     | 906.8462        | 3.1        | C57H108O6        | TG 54:1        |
| 83                    | 18.67        | [M+NH <sub>4</sub> ] <sup>+</sup>     | 880.8357        | 2.7        | C55H106O6        | TG 52:0        |

---

<sup>a</sup> GLs screened as potential biomarkers shown in Table 1.

**Table S2 Accurate MS/MS data of AA-containing GLs and corresponding LPCs.**

| No. | GLs                               | $t_R$<br>(min) | $[M+H]^+$<br>( $m/z$ ) | Fragment ion<br>( $m/z$ )                              | Peak intensity ( $\times e^3$ ) <sup>a</sup> |                          |                          |
|-----|-----------------------------------|----------------|------------------------|--------------------------------------------------------|----------------------------------------------|--------------------------|--------------------------|
|     |                                   |                |                        |                                                        | Controls                                     | A $\beta$ -treated       | A $\beta$ + EGCG         |
| 1   | LPC 16:0                          | 2.21           | 496.3430               | 184.0728, 258.1104,<br>240.1009                        | 0.35±0.04                                    | 0.81±0.08 <sup>b</sup>   | 0.57±0.06 <sup>c</sup>   |
| 2   | LPC 18:0                          | 2.95           | 524.3686               | 184.0726, 258.1088,<br>240.0991                        | 3.03±0.36                                    | 5.68±1.67 <sup>b</sup>   | 2.45±0.60 <sup>c</sup>   |
| 3   | PC 16:0/20:4                      | 6.13           | 782.5725               | 184.0728, 496.3387,<br>544.3369, 478.3327,<br>526.3205 | 8.22±1.15                                    | 14.68±4.14 <sup>b</sup>  | 6.92±1.36 <sup>c</sup>   |
| 4   | PC 18:0/20:4                      | 7.00           | 810.6063               | 184.0735, 524.3734,<br>506.3529, 544.3324,<br>526.3269 | 0.74±0.12                                    | 1.26±0.20 <sup>b</sup>   | 1.04±0.11 <sup>c</sup>   |
| 5   | Ratio of (LPC 16:0)/(PC16:0/20:4) |                |                        |                                                        | 0.044±0.008                                  | 0.058±0.012 <sup>b</sup> | 0.086±0.022 <sup>c</sup> |
| 6   | Ratio of (LPC 18:0)/(PC18:0/20:4) |                |                        |                                                        | 4.12±0.41                                    | 4.53±1.51                | 2.38±0.60 <sup>c</sup>   |

<sup>a</sup> Peak intensities were external scaled and normalized with cell numbers and the intensity of internal standard;

<sup>b</sup> Student's *T*-test,  $P < 0.05$ , vs. control group;

<sup>c</sup> Student's *T*-test,  $P < 0.05$ , vs. A $\beta$ -treated group.

**Fig. S1 Peak areas of eight randomly selected GLs at each cycle of extraction.** Cellular GLs were firstly extracted according to the methods described in the manuscript. The upper layer phase was then re-extracted three times by using the solution prepared by combining water, methanol, chloroform, and sodium acetate in the volumetric ratio of 1:2.5:3.75:1 (see in Ref 25). Six parallel samples were prepared and analyzed.

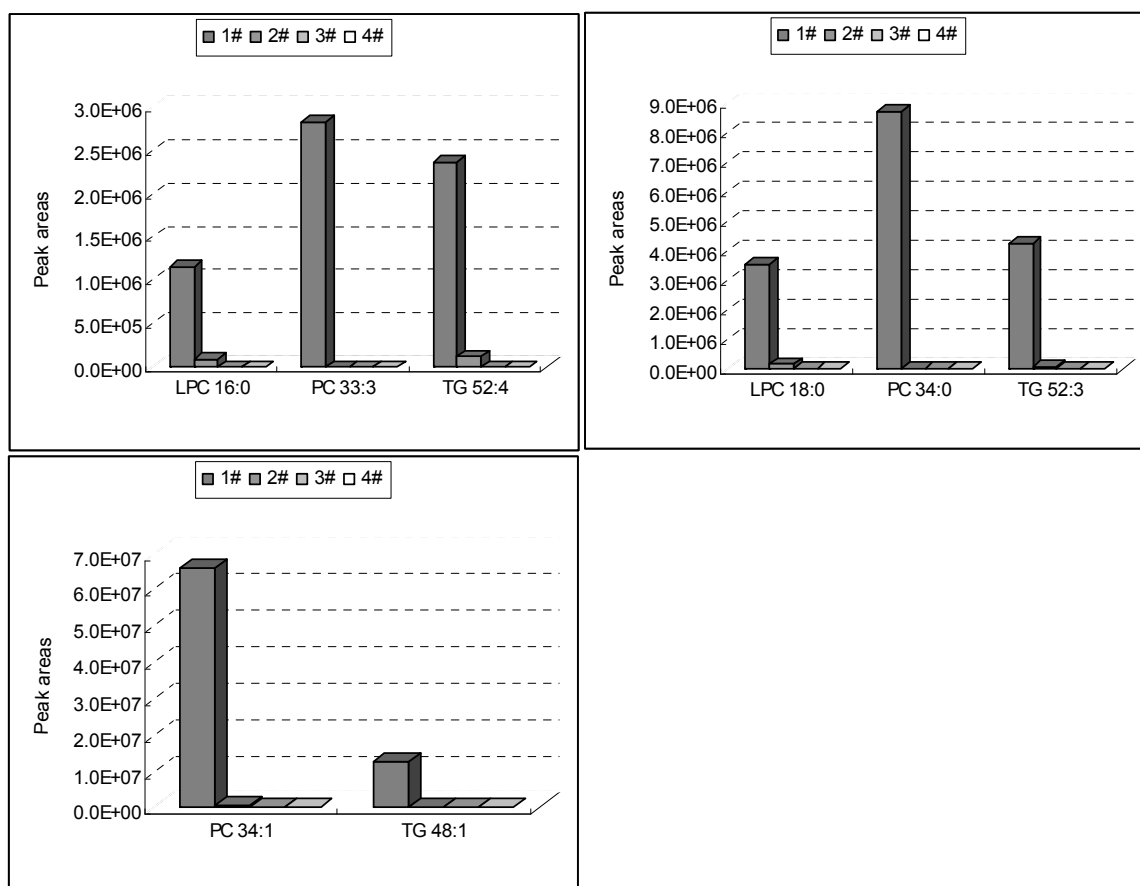

**Fig. S2** Extract ion chromatograms of LPC 18:0 and PC 34:0 in 1# to 4# extracts.

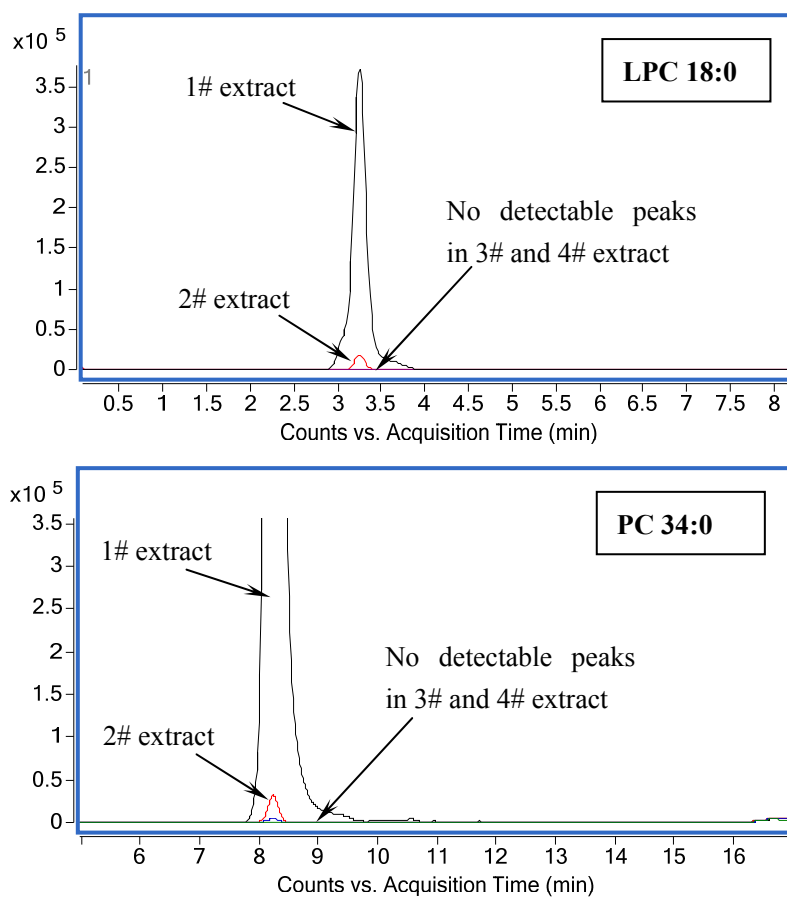

Supplement: c2mb25126d.pdf [file c2mb25126d.pdf]
